# Supplementary material
Source: publisher site journal article supplement (https://www.dovepress.com/article/480522)
Supplement: Supplementary file 1 [file get_supplementary_file.php]

**Supplementary Figures**


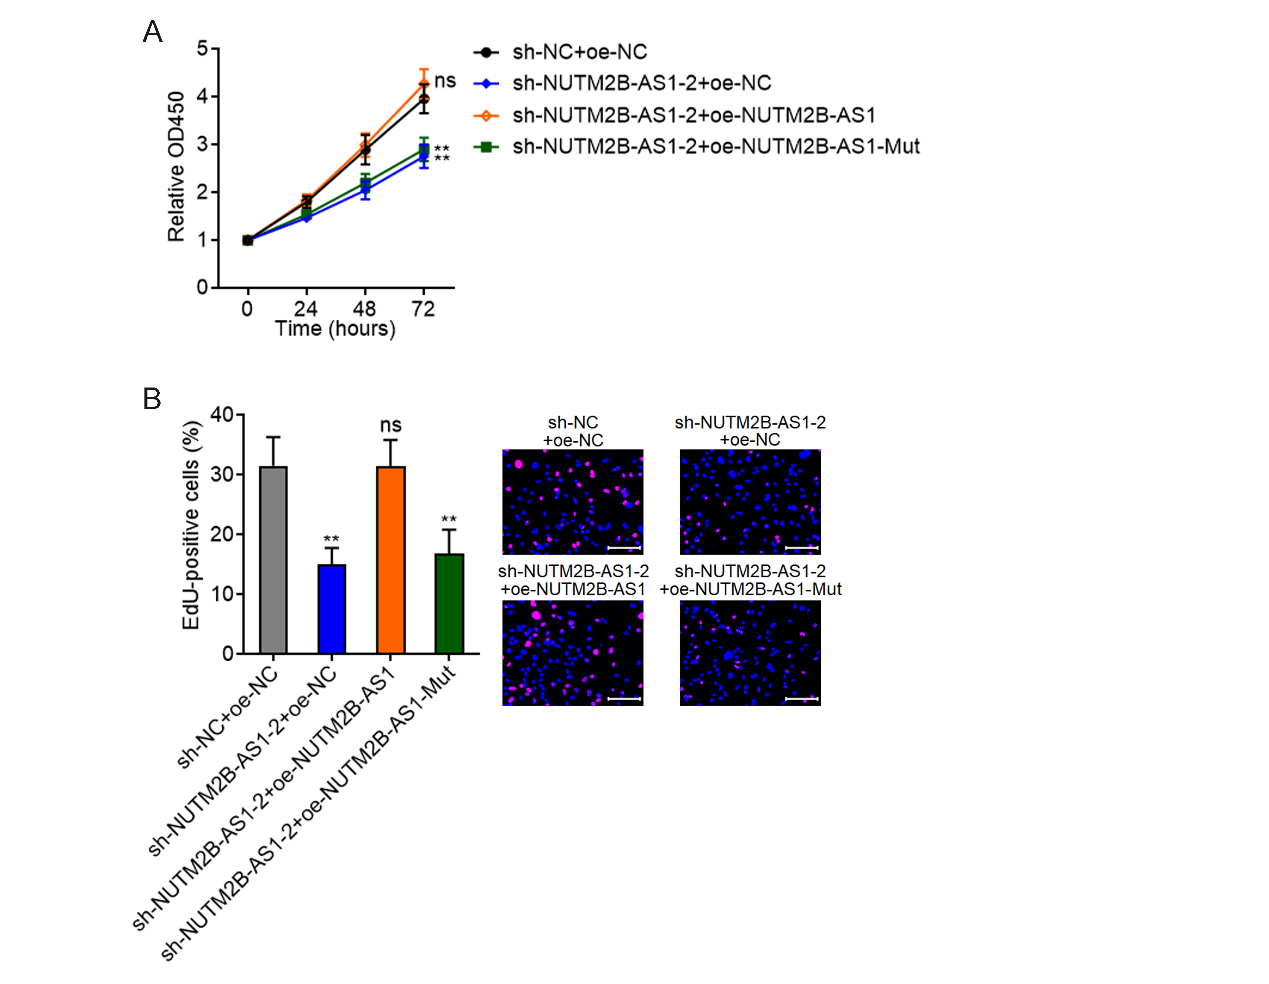
**Supplementary Figure 1** Overexpression ofm6A-methylated NUTM2B-AS1 rescued the reduced cell proliferation caused by NUTM2B-AS1 depletion. (**A**) After transient overexpression of WT or m6A methylation sites mutated NUTM2B-AS1 in HuH-7 cells with depletion of NUTM2B-AS1, cell proliferation was measured by CCK-8 assays. (**B**) After transient overexpression of WT or m6A methylation sites mutated NUTM2B-AS1 in HuH-7 cells with depletion of NUTM2B-AS1, cell proliferation was measured by EdU assays. Scale bars, 100 µm. Results are shown as mean ± SD of 3 independent experiments. ***P* < 0.01, ns, not significant, by one-way ANOVA followed by Dunnett's multiple comparisons test.

**
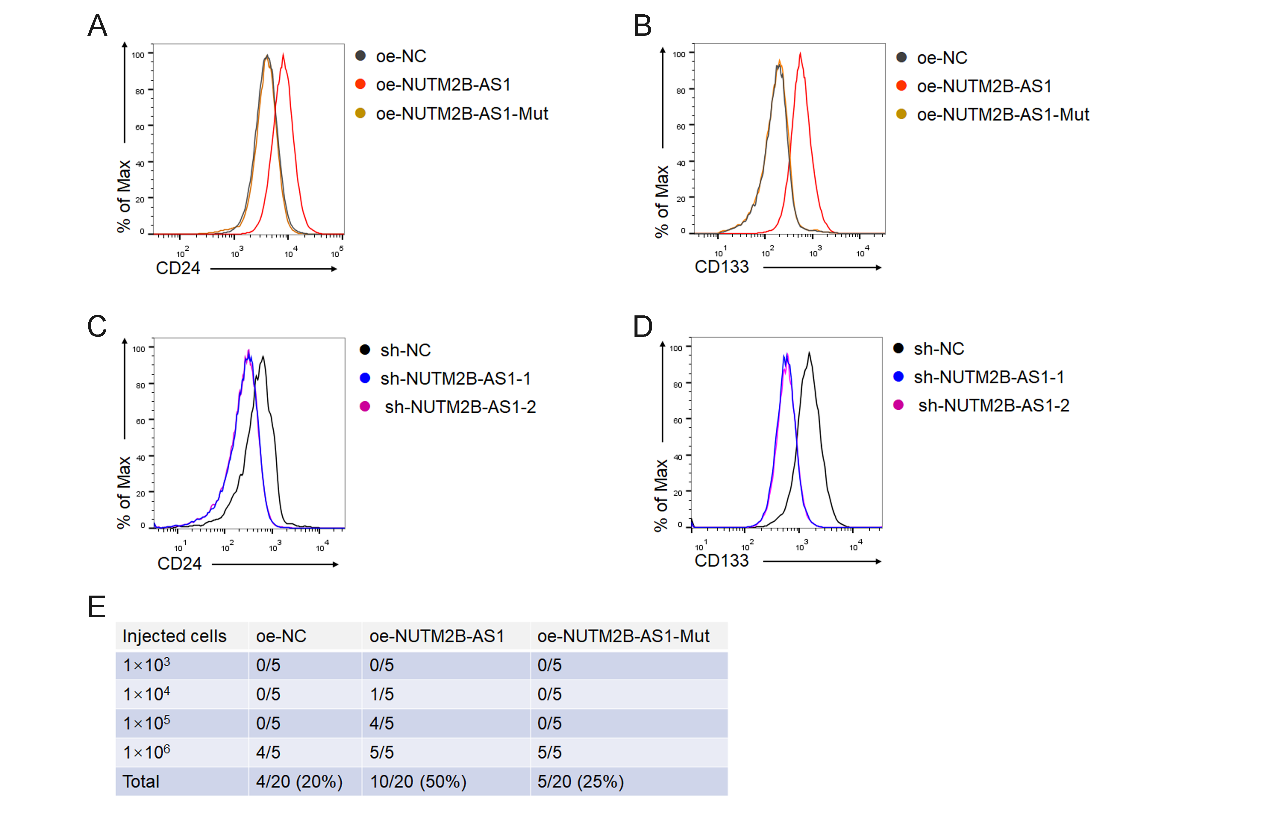
Supplementary Figure 2** m6A-methylated NUTM2B-AS1 enhanced stemness features of HCC. (**A** and **B**) The protein expression of liver cancer stem cell markers CD24 (**A**) and CD133 (**B**) was measured by flow cytometry in SNU-398 cells with stable overexpression of WT or mutated NUTM2B-AS1. (**C** and **D**) The protein expression of liver cancer stem cell markers CD24 (**C**) and CD133 (**D**) was measured by flow cytometry in HuH-7 cells with stable depletion of NUTM2B-AS1. (**E**) Limiting dilution assays results of SNU-398 cells with stable overexpression of WT or mutated NUTM2B-AS1.

| Feature | NUTM2B-AS1 expression | | χ2 | *p*-value* |
| --- | --- | --- | --- | --- |
| low | higha |
| Age |  |  | 1.270 | 0.260 |
| >50 | 19 | 23 |  |  |
| ≤50 | 11 | 7 |  |  |
| Gender |  |  | 0.111 | 0.739 |
| Male | 25 | 24 |  |  |
| Female | 5 | 6 |  |  |
| HBs antigen |  |  | 1.002 | 0.317 |
| Positive | 23 | 26 |  |  |
| Negative | 7 | 4 |  |  |
| Liver cirrhosis |  |  | 0.693 | 0.405 |
| With | 11 | 8 |  |  |
| Without | 19 | 22 |  |  |
| AFP (ng/ml) |  |  | 4.444 | 0.035 |
| >20 | 14 | 22 |  |  |
| ≤20 | 16 | 8 |  |  |
| Grade |  |  | 4.286 | 0.038 |
| G1-G2 | 20 | 12 |  |  |
| G3-G4 | 10 | 18 |  |  |
| Tumor pathologic pt |  |  | 2.222 | 0.136 |
| T1-T2 | 25 | 20 |  |  |
| T3-T4 | 5 | 10 |  |  |
| Vascular invasion |  |  | 2.815 | 0.245 |
| None | 21 | 15 |  |  |
| Micro | 7 | 10 |  |  |
| Macro | 2 | 5 |  |  |
| TNM staging |  |  | 4.022 | 0.045 |
| I-II | 25 | 18 |  |  |
| III-IV | 5 | 12 |  |  |

**Supplementary Table 1** Correlation between NUTM2B-AS1 expression levels and clinicopathological characteristics in HCC.

a The medium expression level was used as the cut-off.

* *p*-value was acquired by Pearson chi-square tests.
